# Supplementary material
Source: HighWire-hosted journal article supplement (https://genome.cshlp.org/content/suppl/2005/08/05/15.8.1145)
Supplement: Supp_Fig_2.pdf [file Supp_Fig_2.pdf]

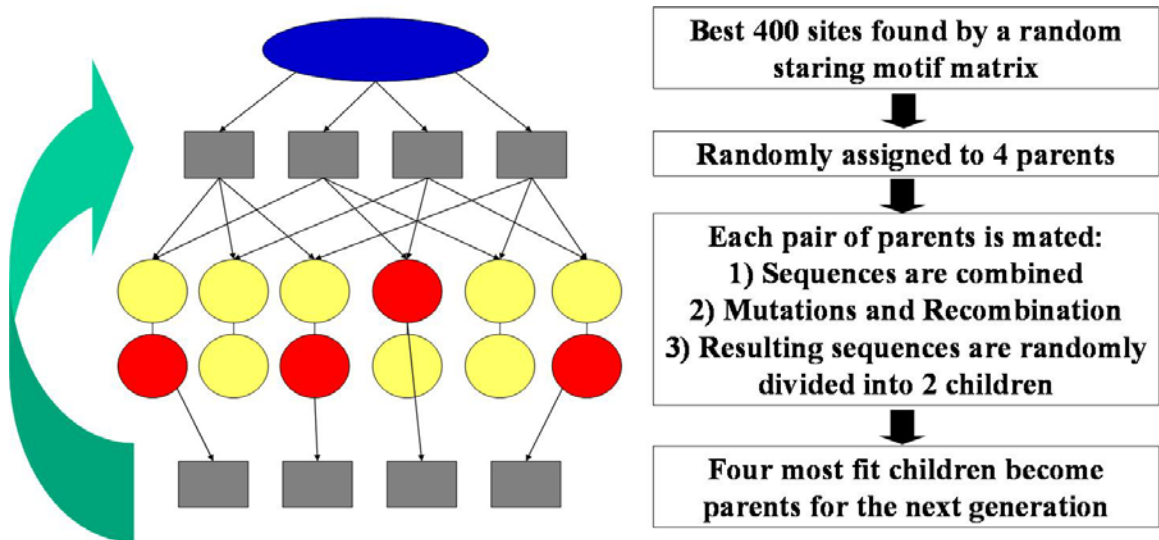

**Supplemental Figure 2.** Flow chart of the genetic algorithm. Blue oval represents the initial starting motif alignment. Squares represent parents. Circles represent progeny. Red Circles represent the most fit progeny which are selected as parents for the next generation.
